# Supplementary material for: Adult Children's Education and Older Parents' Chronic Illnesses in Aging China
Source: Oxford University Press journal article supplement (doi:10.1215/00703370-9766973), 2022-02-18
Supplement: ma_esm.pdf [file ma_esm.pdf]

## Appendix

Table A1 Compulsory Education Laws in Different Provinces

| Province       | Law effect year |
|----------------|-----------------|
| Beijing        | 1986            |
| Hebei          | 1986            |
| Shanxi         | 1986            |
| Liaoning       | 1986            |
| Heilongjiang   | 1986            |
| Zhejiang       | 1986            |
| Jiangxi        | 1986            |
| Chongqing      | 1986            |
| Sichuan        | 1986            |
| Tianjin        | 1987            |
| Jilin          | 1987            |
| Shanghai       | 1987            |
| Jiangsu        | 1987            |
| Anhui          | 1987            |
| Shandong       | 1987            |
| Henan          | 1987            |
| Hubei          | 1987            |
| Yunnan         | 1987            |
| Guangdong      | 1987            |
| Guizhou        | 1988            |
| Shaanxi        | 1988            |
| Xinjiang       | 1988            |
| Qinghai        | 1988            |
| Inner Mongolia | 1988            |
| Fujian         | 1989            |
| Hunan          | 1991            |
| Guangxi        | 1991            |
| Gansu          | 1991            |

*Sources:* Provincial Education Yearbooks and Chinese Law and Regulation Information Database.

Table A2 Adding Province-specific Quadratic Trends in Adult Children's Birth Year

|                                     | (1)<br>Hypertension | (2)<br>Diabetes  |
|-------------------------------------|---------------------|------------------|
| Adult children's years of schooling | -0.051*<br>(0.025)  | 0.022<br>(0.021) |
| Observations                        | 28,636              | 20,965           |

*Notes:* All regressions include controls for adult children's characteristics (age; age squared; and indicators for female, being married, birth order [1<sup>st</sup>, 2<sup>nd</sup>, 3<sup>rd</sup>, and 4<sup>th</sup>], and number of siblings), controls for parents' characteristics (age; age squared; and indicators for female, being married, highest educational attainment [illiterate, primary, junior high and senior high school or above] and rural *hukou*), province fixed effects, and province-specific adult children's birth year linear trends. We further add province-specific quadratic trends in children's birth year. Standard errors, clustered at the province children's year of birth level, are reported in parentheses.

\* $p < .05$

Table A3 The Effects of Exposure to CEL on Adult Children's Years of Schooling

|                                                               | (1)<br>Full sample | (2)<br>Low-level<br>schooling areas | (3)<br>Middle-level<br>schooling areas | (4)<br>High-level<br>schooling areas |
|---------------------------------------------------------------|--------------------|-------------------------------------|----------------------------------------|--------------------------------------|
| <b>Panel A: Analytical sample for hypertension prevalence</b> |                    |                                     |                                        |                                      |
| Exposure to CEL                                               | 0.940**<br>(0.206) | 1.245**<br>(0.353)                  | 1.010*<br>(0.409)                      | 0.885*<br>(0.396)                    |
| R-squared                                                     | 0.284              | 0.285                               | 0.291                                  | 0.296                                |
| Observations                                                  | 28,636             | 11,026                              | 8,890                                  | 8,720                                |
| <b>Panel B: Analytical sample for diabetes prevalence</b>     |                    |                                     |                                        |                                      |
| Exposure to CEL                                               | 0.935**<br>(0.239) | 1.421**<br>(0.435)                  | 1.039*<br>(0.415)                      | 0.787†<br>(0.471)                    |
| R-squared                                                     | 0.272              | 0.291                               | 0.277                                  | 0.282                                |
| Observations                                                  | 20,965             | 6,889                               | 7,652                                  | 6,424                                |

*Notes:* All regressions include controls for adult children's characteristics (age; age squared; and indicators for female, being married, birth order [1<sup>st</sup>, 2<sup>nd</sup>, 3<sup>rd</sup>, and 4<sup>th</sup>], and number of siblings), and controls for parents' characteristics (age; age squared; and indicators for female, being married, highest educational attainment [illiterate, primary, junior high and senior high school or above] and rural *hukou*). Province fixed effects and province-specific adult children's birth year linear trends are also included. Standard errors, clustered at the province children's year of birth level, are reported in parentheses.

† $p < .10$ ; \* $p < .05$ ; \*\* $p < .01$
